# Supplementary material for: Expression of Tight Junction Proteins According to Functional Dyspepsia Subtype and Sex
Source: PubMed Central journal article supplement — J Neurogastroenterol Motil. 2020 Apr 30;26(2):248–58. doi: 10.5056/jnm19208 (PMC7176499; doi:10.5056/jnm19208), 2020-04-30
Supplement: JNM-26-248_Supple.pdf [file JNM-26-248_Supple.pdf]

**Supplementary Table.** Primer Sequences for Quantitative Reverse Transcription Polymerase Chain Reaction

| Gene name              | Forward primer                        | Reverse primer                      | Size (bp) |
|------------------------|---------------------------------------|-------------------------------------|-----------|
| CLDN1                  | 5-CTC GCC TTC CTG GGA TGG AT-3        | 5-TAT CTG CCC GGT GCT TTG CG-3      | 149       |
| CLDN2                  | 5-CTC CCT GGC CTG CAT TAT CTC-3       | 5-ACC TGC TAC CGC CAC TCT GT-3      | 71        |
| CLDN4                  | 5-CCC CGA GAG AGA GTG CCC TG-3        | 5-AGC GTC CAC GGG AGT TGA GGA-3     | 209       |
| OCLN                   | 5-TGT GGA TCC CCA GGA GGC CA-3        | 5-AGG CAC GTC CTG TGT GCC TG-3      | 213       |
| ZO-1                   | 5-CAA GAT AGT TTG GCA GCA AGA GAT G-3 | 5-ATC AGG GAC ATT CAA TAG CGT AGC-3 | 182       |
| ACTB ( $\beta$ -actin) | 5-TTC GAG CAA GAG ATG GCC AC-3        | 5-CGG ATG TCC ACG TCA CAC TT-3      | 202       |

CLDN, claudin; OCLN, occludin; ZO-1, zonula occludens-1; ACTB, actin beta.
